# Supplementary material for: Yellow and red polymorphic co-crystals of phenyl-substituted pyrazinacene and naphthalene via π-hole⋯π interactions
Source: Royal Society of Chemistry journal article supplement (doi:10.1039/d5ce00114e), 2025-01-01
Supplement: d5ce00114e1.pdf [file d5ce00114e1.pdf]

Supplementary Information

**Yellow and Red Polymorphic Co-crystals of Phenyl-Substituted Pyrazinacene and Naphthalene via  $\pi$ -Hole $\cdots\pi$  Interactions**

K. Nakada, G. J. Richards, A. Hori\*

\*Corresponding author (e-mail: ahorti@shibaura-it.ac.jp)

---

**Table of Contents**

|                                                                                 |       |      |
|---------------------------------------------------------------------------------|-------|------|
| <b>S1.</b> Preparation and TG studies of <b>1</b> with naphthalene ( <b>2</b> ) | ..... | p. 1 |
| <b>S2.</b> Crystal data and Hirshfeld surface analysis of <b>1•2</b>            | ..... | p. 2 |
| <b>S3.</b> pXRD studies of <b>1</b> with naphthalene ( <b>2</b> )               | ..... | p. 8 |
| <b>S4.</b> DFT calculations of co-crystal <b>1•2</b>                            | ..... | p. 9 |

---

**S1. Preparation and TG studies of 1 with naphthalene (2)**

*S1-1 Preparation of 1•2 (Y and R)*

A chloroform solution (6 mL) of **1** (3.0 mg, 9.0  $\mu$ mol) and **2** (11 mg, 90  $\mu$ mol) was prepared in a vial. The solvent was allowed to evaporate naturally over one day, resulting in the precipitation of the yellow co-crystal of **1•2 (Y)** along with transparent crystals of **2**. Using the same method, a chloroform solution of **1** (3.0 mg, 9.0  $\mu$ mol) and **2** (1.1 mg, 9.0  $\mu$ mol) was evaporated, yielding the red co-crystal of **1•2 (R)**.

When slow evaporation of chloroform with isopropanol was performed in a test tube, both **1•2 (Y and R)** formed larger crystals. However, no selective formation was observed due to the volatilization of naphthalene.

*S1-2. Thermogravimetric (TG) results*

TG results indicate that the guest release process is consistent with 1:1 cocrystal for a) **1•2 (Y)** and b) **1•2 (R)**, as shown in **Figure S1**. For both crystals, it was found that the removal process proceeds in two steps.

For **1•2 (Y)**, during the first step, heating up to around 90 °C resulted in the release of excess naphthalene adhered to the surface of the powder. A second-step reduction was observed between 90 °C and 105 °C. The measured mass loss at 105 °C was 27.9%, which is close to the calculated value of 27.7%.

For **1•2 (R)**, during the first step, naphthalene adhered to the surface of the powder was released up to around 70 °C. A second-step reduction was observed between 70 °C and 90 °C. The measured mass loss at 90 °C was 23.7%, which is close to the calculated value of 27.7%.

Because naphthalene (**2**) can easily evaporate from the crystals at room temperature, it was not possible to easily distinguish naphthalene (**2**) on the surface of the crystals from naphthalene inside the crystals.

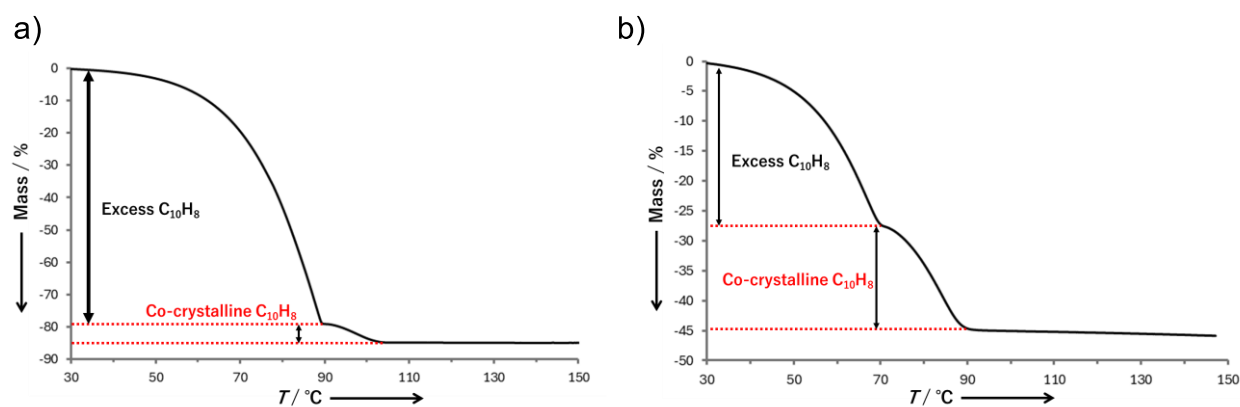

**Figure S1.** TG of a) **1•2 (Y)** and b) **1•2 (R)**. The scan rate was  $5.0\text{ }^{\circ}\text{C min}^{-1}$ .

## S2. Crystal data and Hirshfeld surface analysis of **1•2**

### S2-1. Crystal data of **1•2 (Y)** and **1•2 (R)**

The crystal data of two structures are shown in **Table S1**, and each structure was shown in **Figures S2-3**.

**Table S1.** Crystal data and structure refinements for **1•2 (Y)** and **1•2 (R)**

|                             | <b>1•2 (Y)</b>                                                       | <b>1•2 (R)</b>                                                       |
|-----------------------------|----------------------------------------------------------------------|----------------------------------------------------------------------|
| Chemical formula            | $\text{C}_{20}\text{H}_{10}\text{N}_6 \cdot \text{C}_{10}\text{H}_8$ | $\text{C}_{20}\text{H}_{10}\text{N}_6 \cdot \text{C}_{10}\text{H}_8$ |
| Description, color          | Prismatic, yellow                                                    | Plate, red                                                           |
| Crystal size                | $0.33 \times 0.25 \times 0.07$                                       | $0.28 \times 0.21 \times 0.16$                                       |
| Formula weight              | 462.50                                                               | 462.50                                                               |
| $T$ [K]                     | 160                                                                  | 160                                                                  |
| Crystal system              | Monoclinic                                                           | Monoclinic                                                           |
| Space group                 | $P2_1/c$                                                             | $P2_1/c$                                                             |
| $a$ [Å]                     | 14.0115 (15)                                                         | 12.312 (6)                                                           |
| $b$ [Å]                     | 7.1139 (7)                                                           | 7.042 (4)                                                            |
| $c$ [Å]                     | 24.401 (3)                                                           | 26.902 (13)                                                          |
| $\alpha$ [°]                | 90                                                                   | 90                                                                   |
| $\beta$ [°]                 | 102.624 (4)                                                          | 98.740 (17)                                                          |
| $\gamma$ [°]                | 90                                                                   | 90                                                                   |
| $V$ [Å <sup>3</sup> ]       | 2373.4 (4)                                                           | 2306 (2)                                                             |
| $Z$                         | 4                                                                    | 4                                                                    |
| $D_c$ [g cm <sup>-3</sup> ] | 1.294                                                                | 1.332                                                                |
| $F(000)$                    | 960                                                                  | 960                                                                  |
| $R_{\text{int}}$            | 0.063                                                                | 0.072                                                                |

|                         |         |         |
|-------------------------|---------|---------|
| Reflections measured    | 25961   | 22427   |
| Reflections independent | 4199    | 4065    |
| GOF                     | 1.041   | 1.076   |
| $R [(I) > 2\sigma(I)]$  | 0.048   | 0.065   |
| $wR (F_o^2)$            | 0.128   | 0.149   |
| CCDC No.                | 2419629 | 2419630 |

### S2-2. X-ray crystal structure of **1**•**2** (**Y**)

In the crystal structure (**Figure S2**), whole structures of **1** and naphthalene (**2**) were observed in the asymmetric unit. H atoms attached to C atoms were refined as riding on their idealized positions, with C-H = 0.95 Å for aromatic atoms.

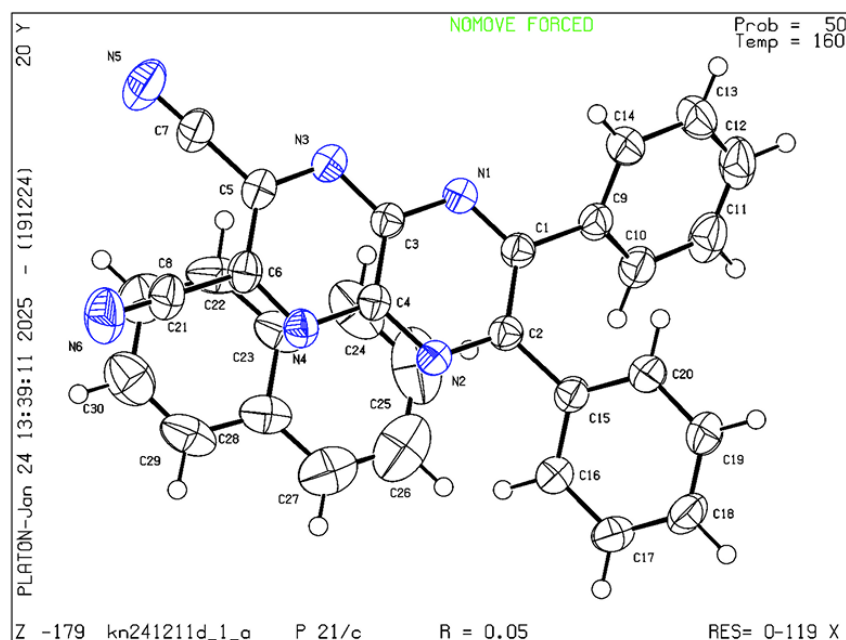

**Figure S2.** The molecular structure of **1**•**2** (**Y**) drawing by PLATON from checkCIF.

### S2-3. X-ray crystal structure of **1**•**2** (**R**)

In the crystal structure (**Figure S3**), whole structures of **1** and naphthalene (**2**) were observed in the asymmetric unit. H atoms attached to C atoms were refined as riding on their idealized positions, with C-H = 0.95 Å for aromatic atoms.

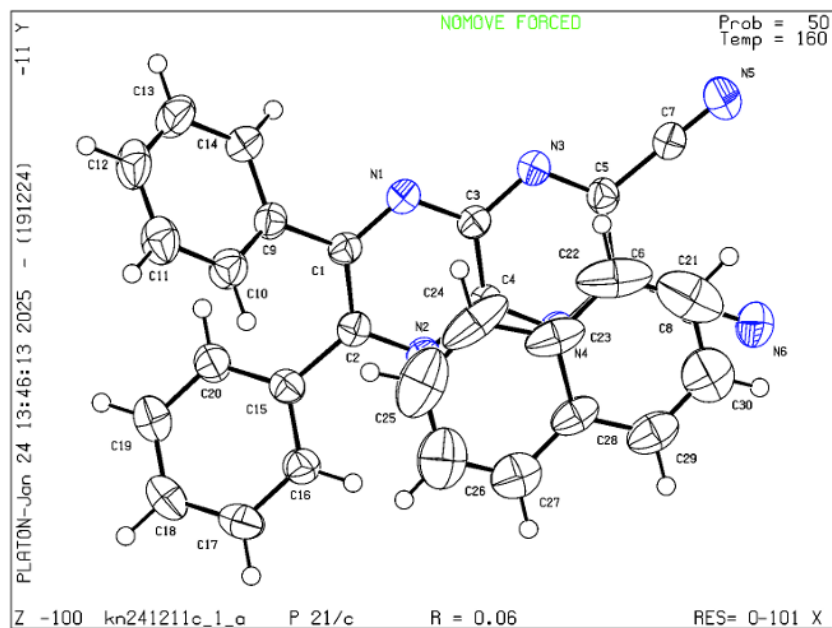

**Figure S3.** The molecular structure of **1·2 (R)** drawing by PLATON from checkCIF.

S2-4. Fingerprint plots of **1** in **1·2 (Y)**

HS analysis shows the contribution of intermolecular interactions of **1·2 (Y)** (**Figure S4**).

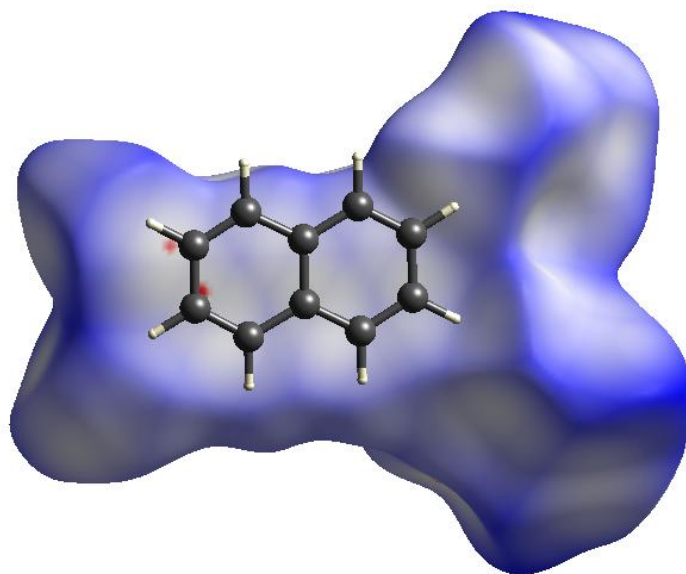

**C (in)···All (out) 24.3%**

**C (in)···C (out) 6.7%**

**C (in)···N (out) 2.8%**

**C (in)···H (out) 14.9%**

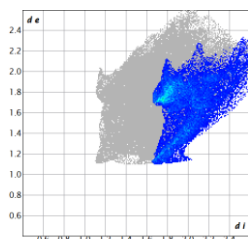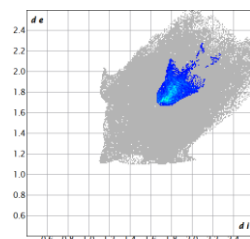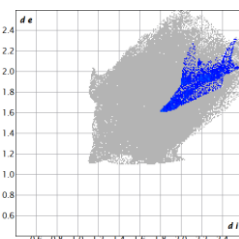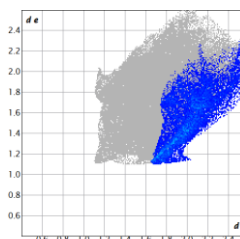

**N (in)···All (out) 29.4%**    **N (in)···C (out) 5.5%**    **N (in)···N (out) 0.7%**    **N (in)···H (out) 23.2%**

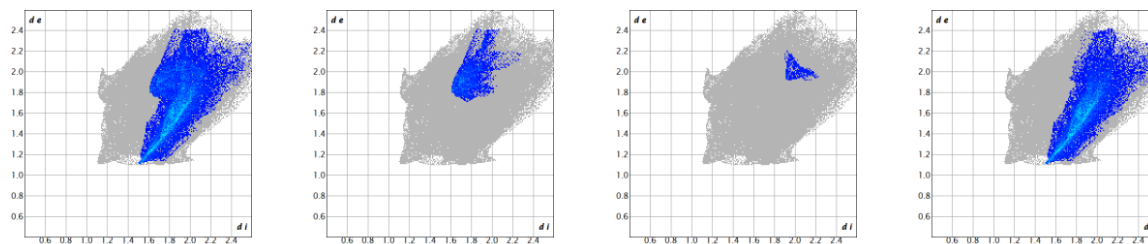

**H (in)···All (out) 46.2%**    **H (in)···C (out) 5.7%**    **H (in)···N (out) 6.7%**    **H (in)···H (out) 33.9%**

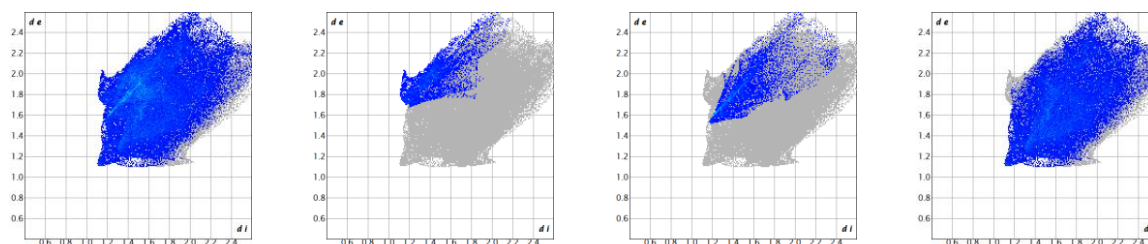

**Figure S4.** Fingerprint plots for **1** in **1•2 (Y)** showing  $d_e$  and  $d_i$  of 0.4–2.6 Å for all atoms.

*S2-5. Fingerprint plots of 2 in 1•2 (Y)*

HS analysis shows the contribution of intermolecular interactions of **1•2 (Y)** (**Figure S5**).

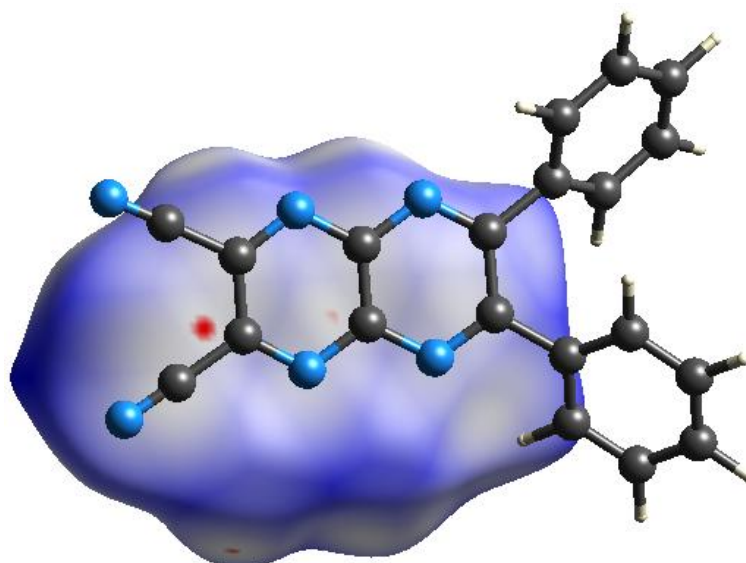

**C (in)···All (out) 26.4%**    **C (in)···C (out) 7.0%**    **C (in)···N (out) 5.6%**    **C (in)···H (out) 13.8%**

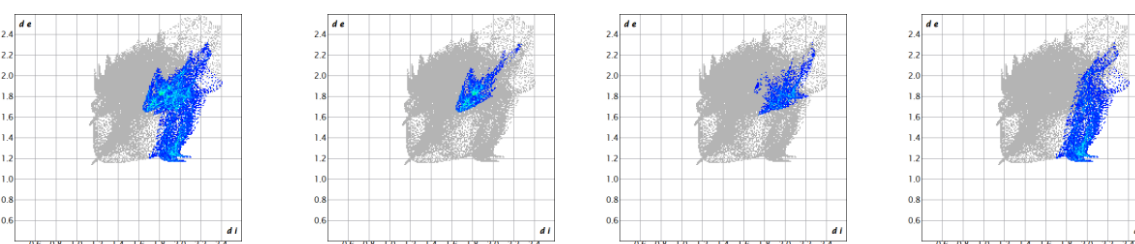

**H (in)···All (out) 73.6%**   **H (in)···C (out) 21.5%**   **H (in)···N (out) 21.6%**   **H (in)···H (out) 30.5%**

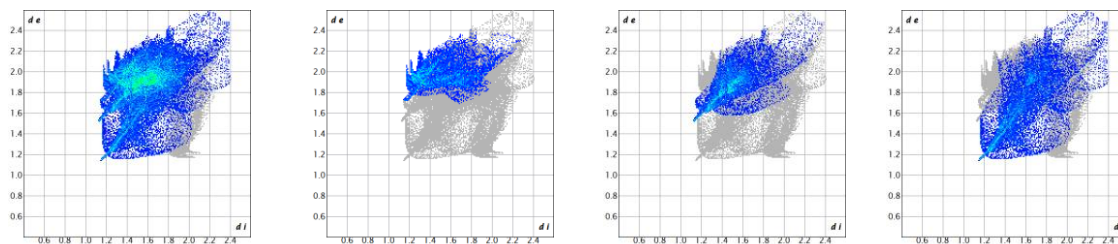

**Figure S5.** Fingerprint plots for **2** in **1·2 (Y)** showing  $d_e$  and  $d_i$  of 0.4–2.6 Å for all atoms.

*S2-6. Fingerprint plots of 1 in 1·2 (R)*

HS analysis shows the contribution of intermolecular interactions of **1·2 (R)** (**Figure S6**).

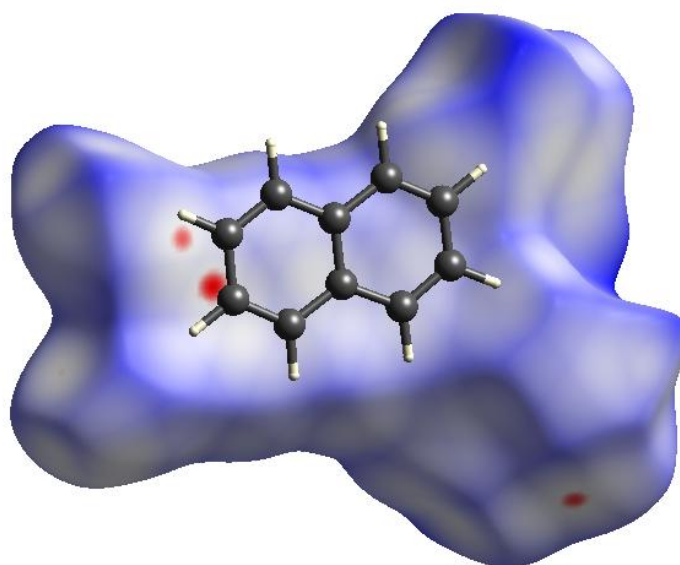

**C (in)···All (out) 25.0%**   **C (in)···C (out) 5.9%**   **C (in)···N (out) 4.7%**   **C (in)···H (out) 14.5%**

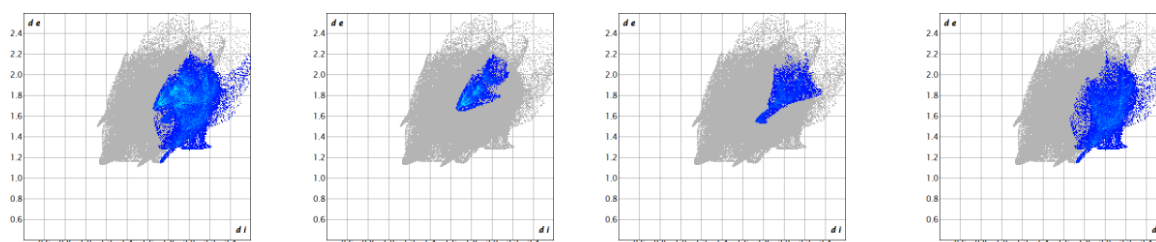

**N (in)···All (out) 29.5%**   **N (in)···C (out) 6.4%**   **N (in)···N (out) 1.1%**   **N (in)···H (out) 22.0%**

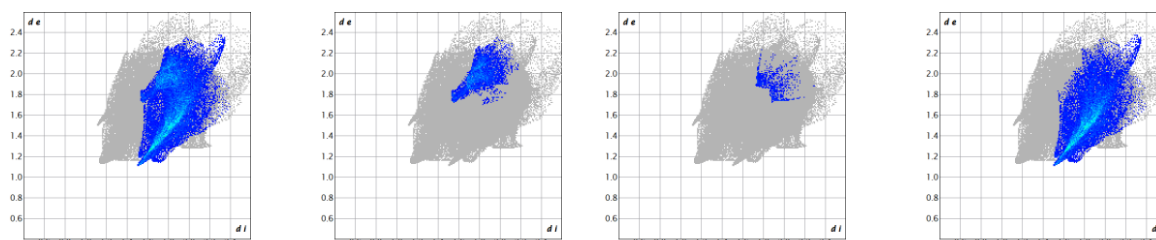

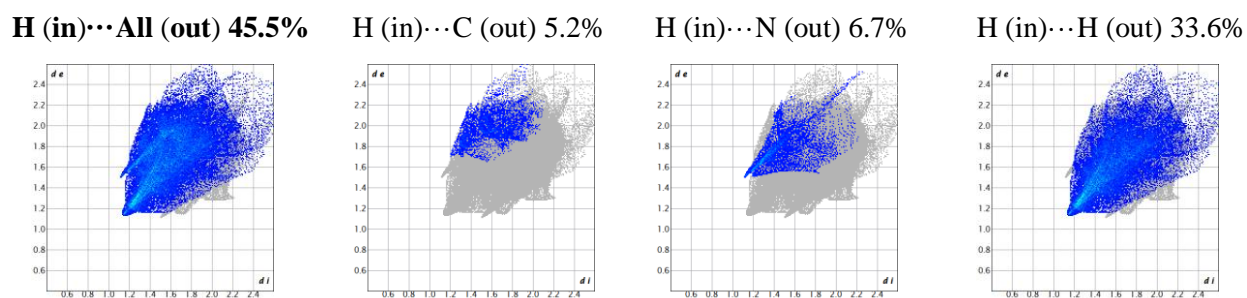

**Figure S6.** Fingerprint plots for **1** in **1·2 (R)** showing  $d_e$  and  $d_i$  of 0.4–2.6 Å for all atoms.

*S2-7. Fingerprint plots of 2 in 1·2 (R)*

HS analysis shows the contribution of intermolecular interactions of **1·2 (R)** (**Figure S7**).

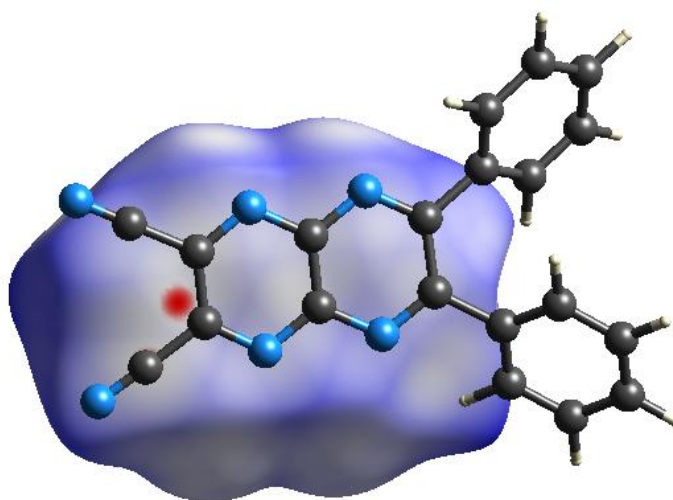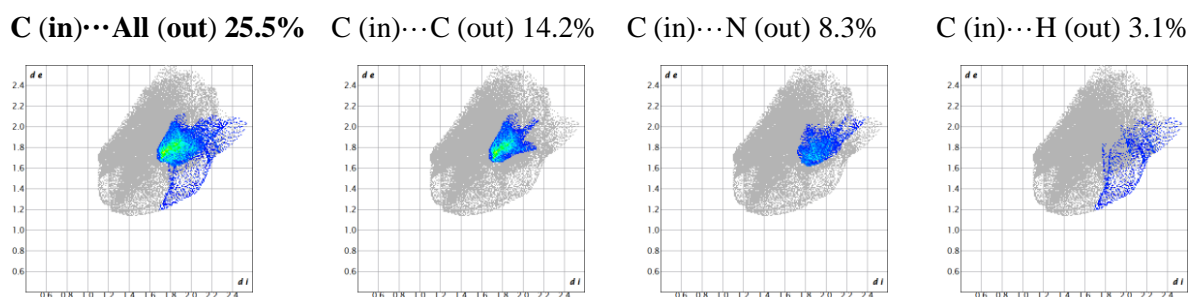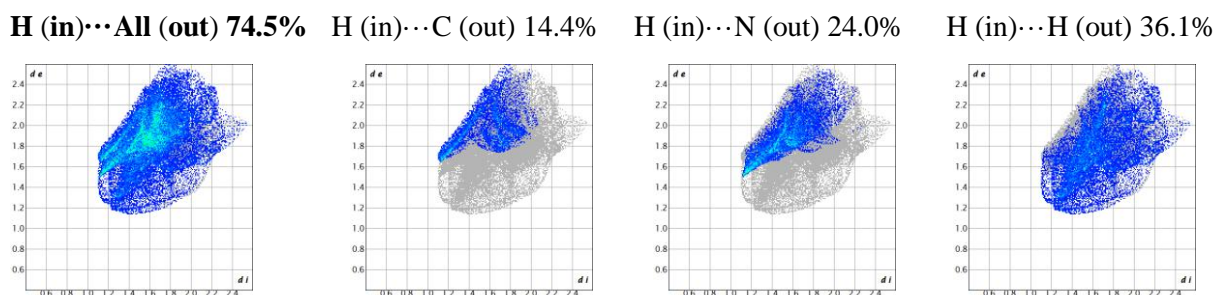

**Figure S7.** Fingerprint plots for **2** in **1·2 (R)** showing  $d_e$  and  $d_i$  of 0.4–2.6 Å for all atoms.

### S3. pXRD studies of **1** with naphthalene (**2**)

#### S3-1. pXRD studies

Powder X-ray diffraction (pXRD) pattern shows that the obtained powder matches the sum of the peaks calculated from the co-crystal and those of pure naphthalene (**Figure S8-9**).

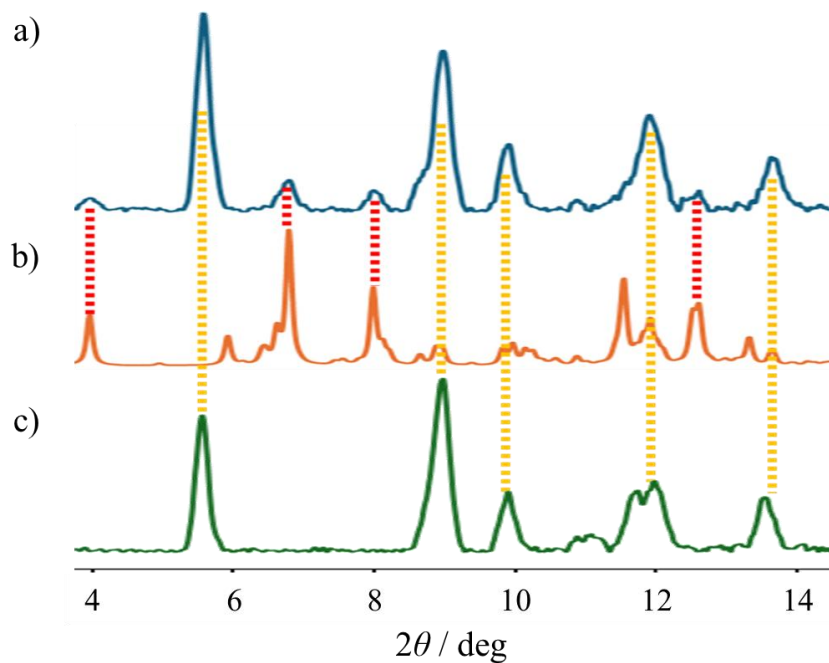

**Figure S8.** pXRD patterns: a) powder sample of **1•2** (**Y**), b) simulation from the single crystal of **1•2** (**Y**) and c) powder sample of **2**.

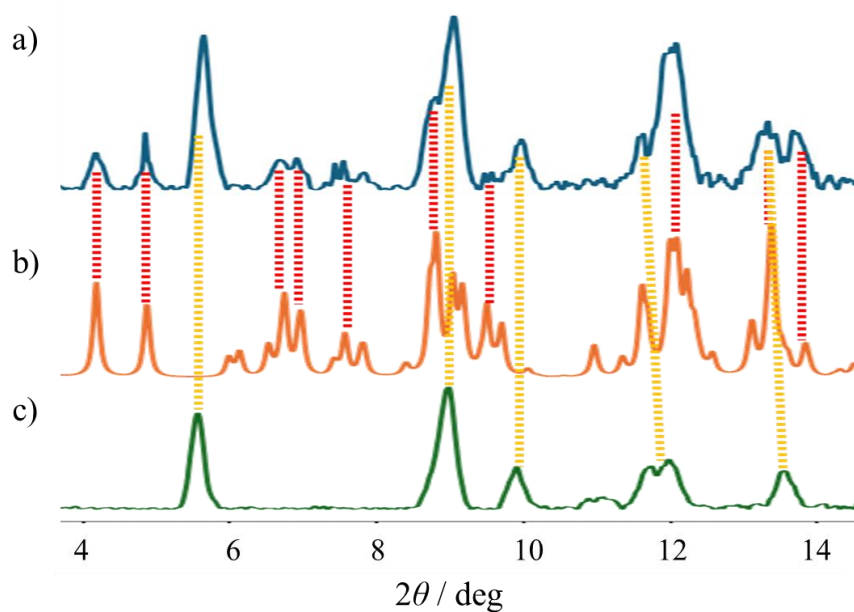

**Figure S9.** pXRD patterns: a) powder sample of **1•2** (**R**), b) simulation from the single crystal of **1•2** (**R**) and c) powder sample of **2**.



#### S4. DFT calculations of co-crystal 1•2

Electrostatic potential (ESP) maps and molecular orbital energies were calculated for the crystal structure, which consists of two molecules of **1** and two molecules of naphthalene (**2**), using DFT with B3LYP 6-311+G (2df, 2p) sets, which clearly support the spectroscopic studies (Figure S10-11). The calculation results were in qualitatively good agreement with the spectroscopic results of Figure 5b and Figure 5c.

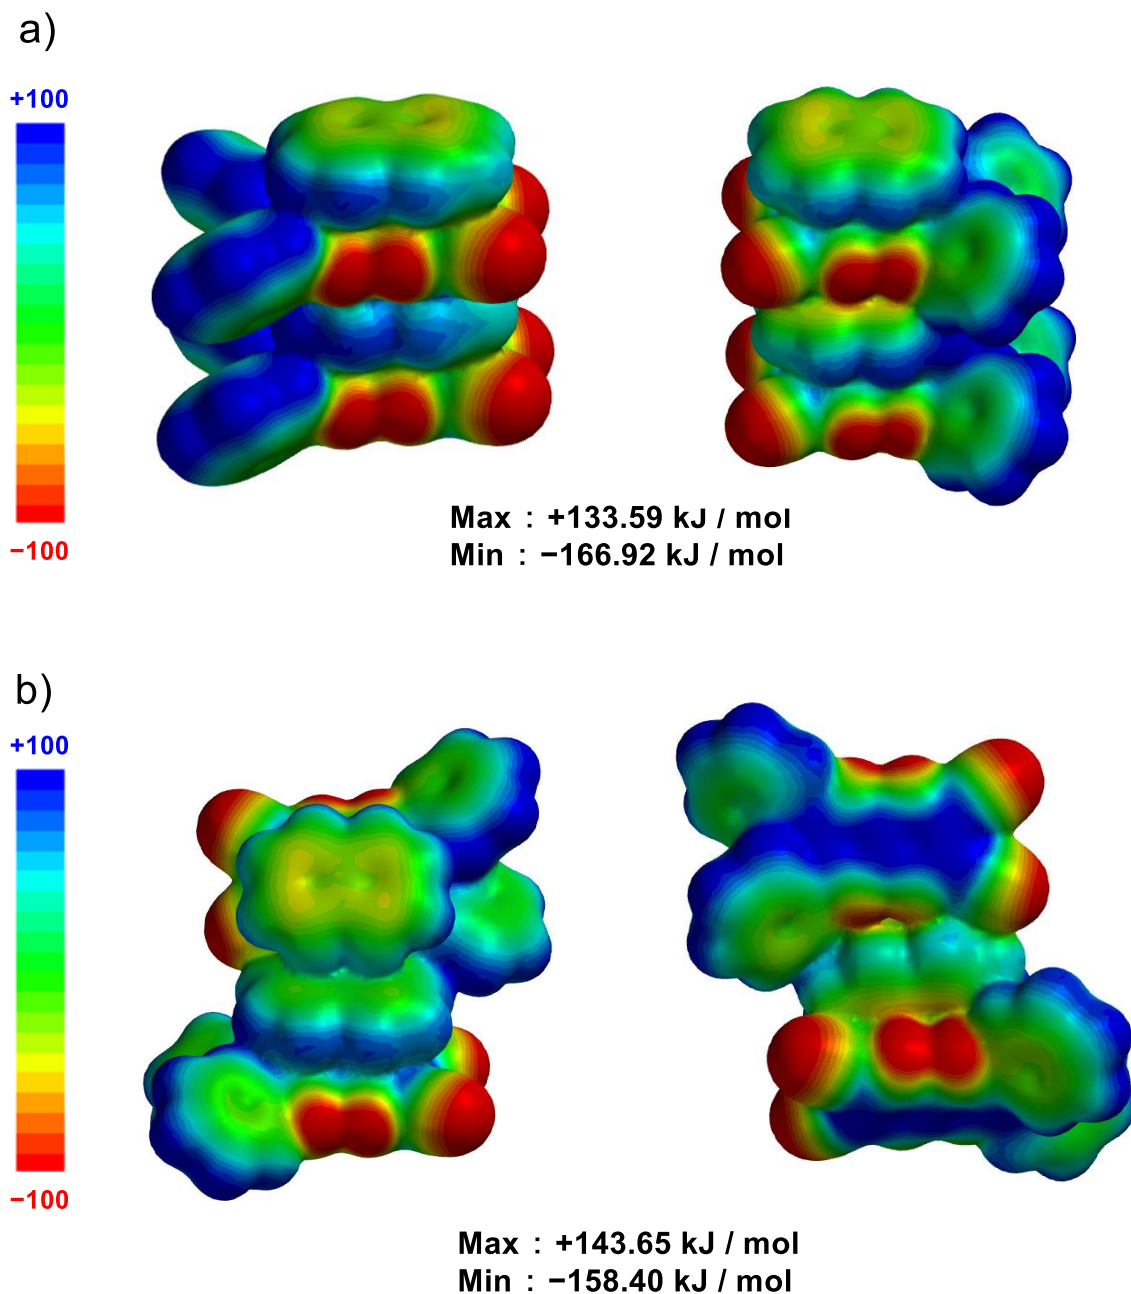

**Figure S10.** The energy potential maps of front and back views of a) **1•2 (Y)** and b) **1•2 (R)** from the crystal structures: the color of the potential is shown between  $-100 \text{ kJ mol}^{-1}$  (red) to  $+100 \text{ kJ mol}^{-1}$  (blue).

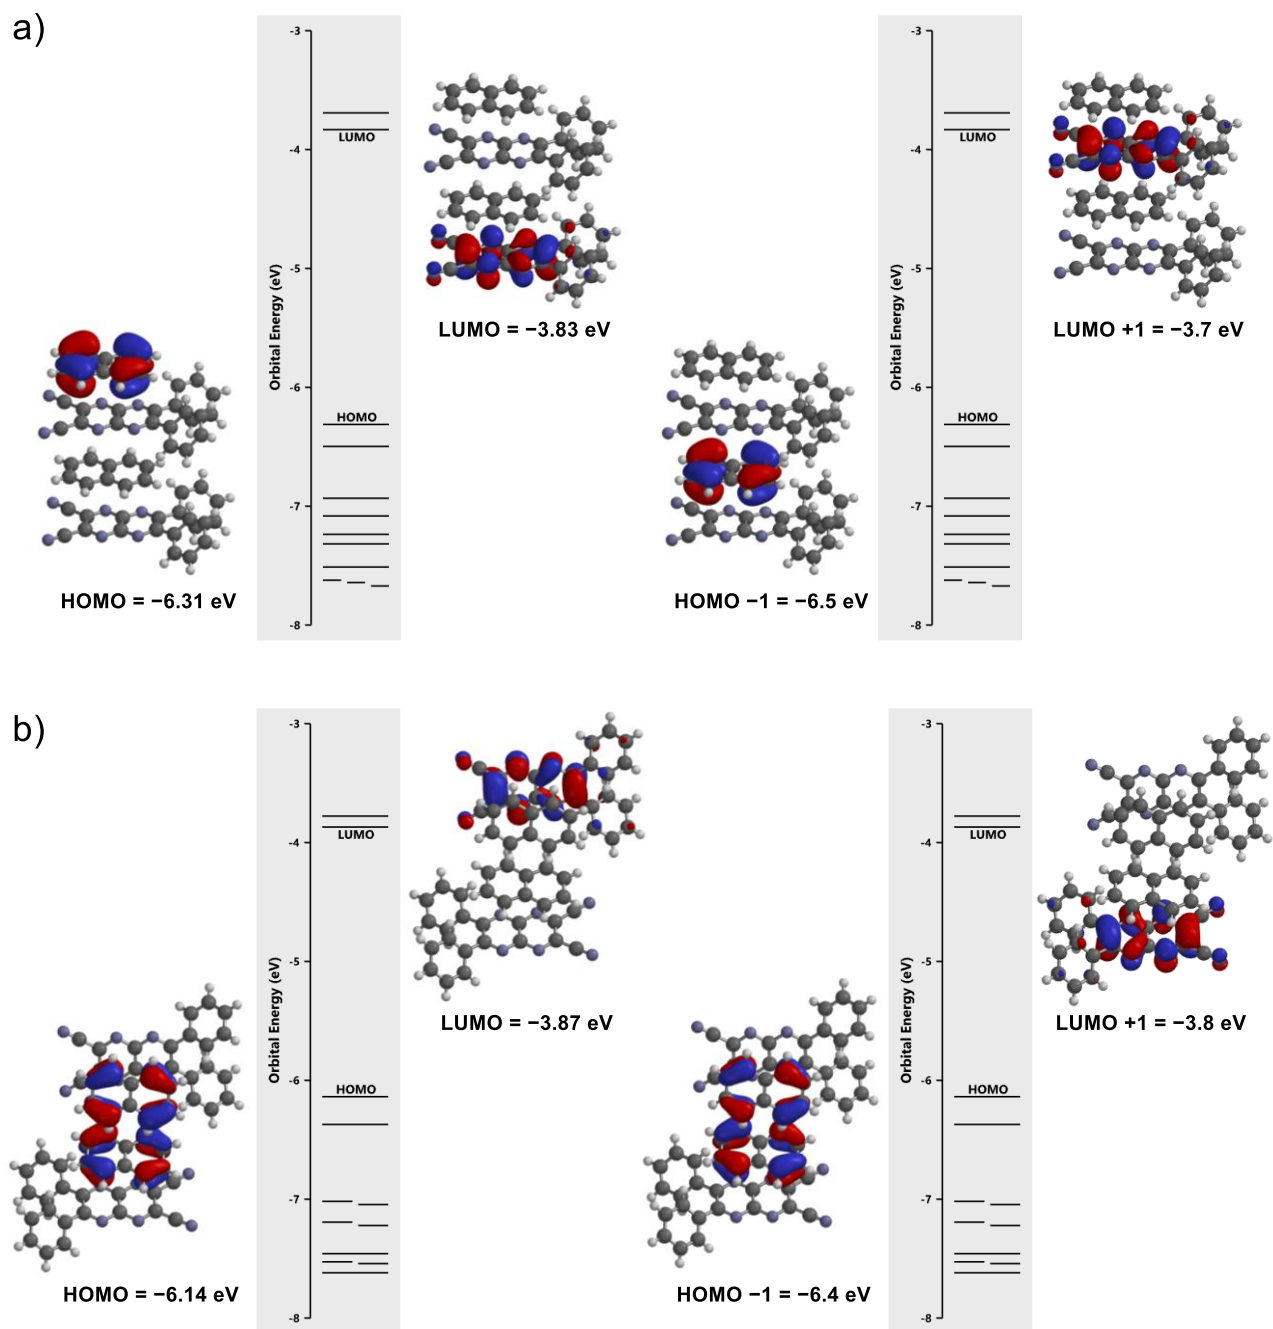

**Figure S11.** Molecular orbital energy level diagrams of a) **1•2 (Y)** and b) **1•2 (R)**.

Predicted UV/vis absorption spectra of **1** and the model structures of **1•2 (Y)** and **1•2 (R)** were obtained using TDDFT with the cam-B3LYP/6-311G\*\* method, based on the crystal structure containing two molecules of **1** and two molecules of naphthalene (**2**). The broad peaks, attributed to charge-transfer absorption bands, were observed experimentally for both **1•2 (Y)** and **1•2 (R)**. These peaks were also confirmed by spectra predicted based on their structures. Although the predicted spectra are blue shifted compared to the experimental data, the absorption band of **1•2 (R)** appears at a longer wavelength than that of **1•2 (Y)**, which is consistent with the experimental results (**Figure S12**).

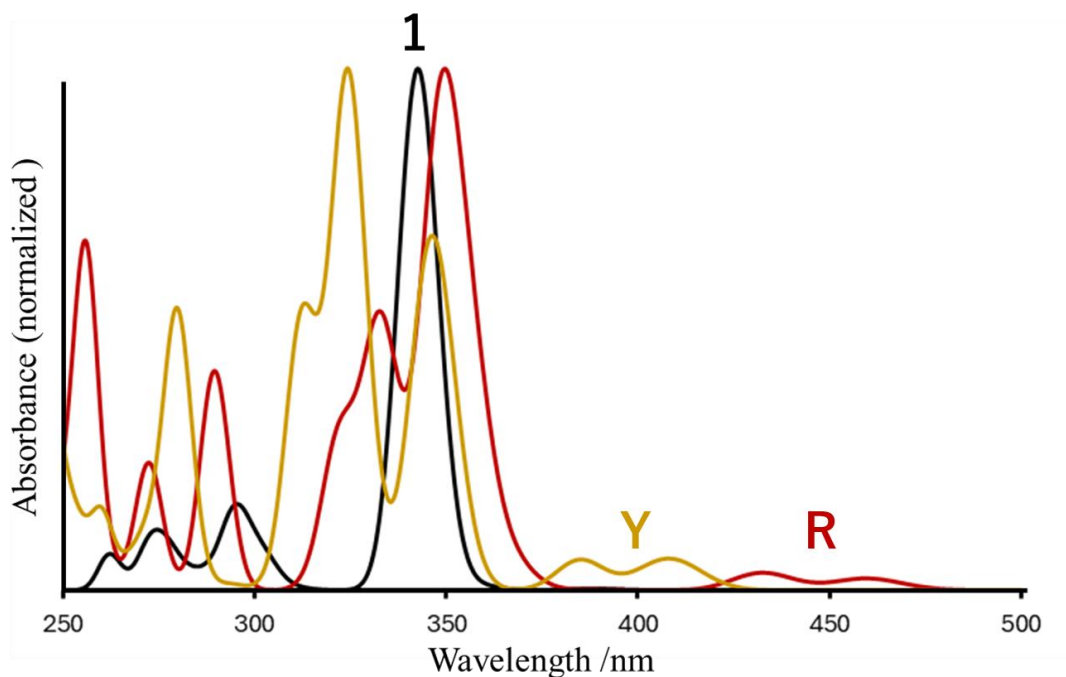

**Figure S12.** Predicted UV/vis absorption spectra of **1**, **1•2 (Y)** and **1•2 (R)** calculated using TDDFT cam-B3LYP 6-311G\*\* method.
